# Supplementary material for: Regular ordering of spherical microdomains in dewetted monolayer islands induced by thermal annealing of spin-coated ultrathin films of a triblock copolymer
Source: Royal Society of Chemistry journal article supplement (doi:10.1039/d1sm00699a), 2021-01-01
Supplement: d1sm00699a1.pdf [file d1sm00699a1.pdf]

## SUPPLEMENTARY INFORMATION

### **Regular Ordering of Spherical Microdomains in Dewetted Monolayer Islands Induced by Thermal Annealing of Spin-Coated Ultrathin Films of a Triblock Copolymer**

Rasha Ahmed Hanafy Bayomi<sup>1,2</sup>, Takashi Aoki<sup>1</sup>,

Sono Sasaki<sup>1</sup>, and Shinichi Sakurai<sup>1,3,\*</sup>

<sup>1</sup> Department of Biobased Materials Science, Graduate School of Science and  
Technology, Kyoto Institute of Technology, Matsugasaki, Sakyo-ku, Kyoto 606-  
8585, Japan

<sup>2</sup> Department of Apparel Design and Technology, Faculty of Applied Arts, Helwan  
University, Orman, Giza 12111, Egypt

<sup>3</sup> Department of Chemical Engineering, Indian Institute of Technology Guwahati,  
Kamrup, Assam 781-039, India

\* Corresponding author.

E-mail address: shin@kit.ac.jp (S. Sakurai).

**Keywords:** Block Copolymer; Spherical Microdomains; Dewetting; Ultrathin Film; Confinement; Monolayer, Regular Ordering; Atomic Force Microscopy.

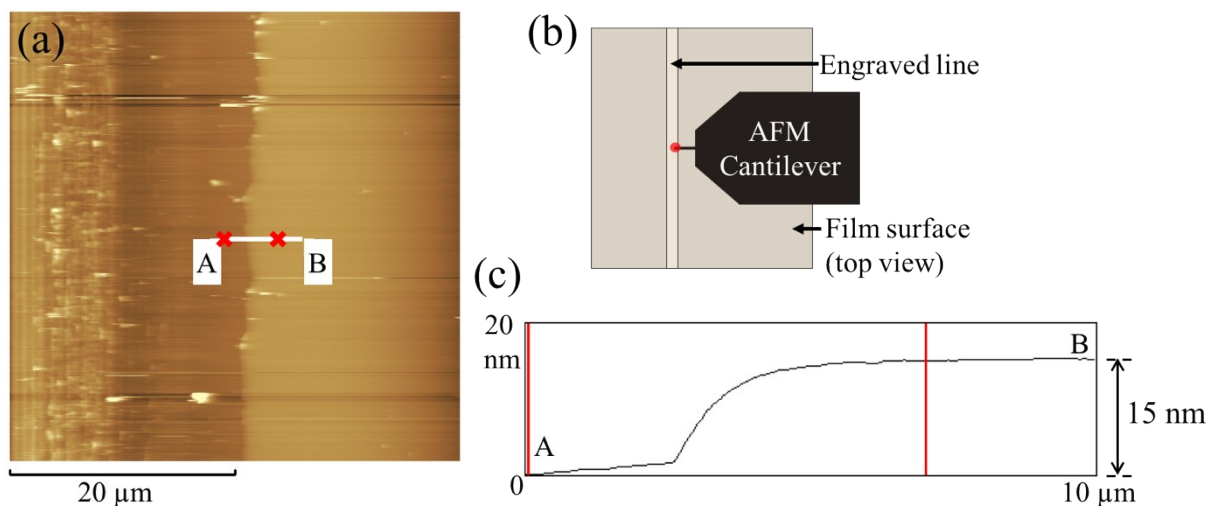

**Fig. S1** (a) AFM height image with an engraved line, used to evaluate the film thickness. (b) Schematic illustration showing a top-view of the applied method used to evaluate the film thickness. (c) Height profile of the film along the A-B line across the engraved line. As a result, the film thickness was evaluated from the height difference as 15 nm.

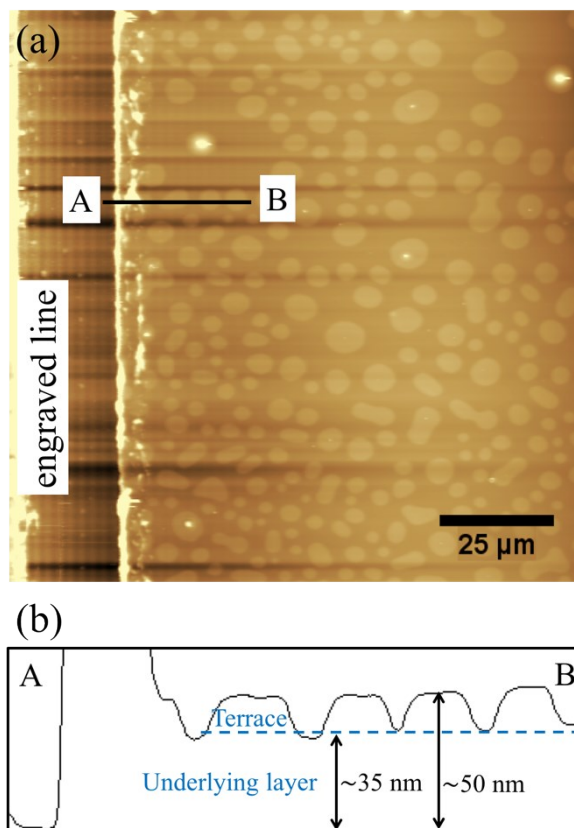

**Fig. S2** (a) AFM height image with an engraved line, used to evaluate the film thickness. (b) Height profile of the film along the A-B line across the engraved line. As a result, the whole film thickness (including the terrace) was evaluated from the height difference as  $\sim 50$  nm. the underlying layer was evaluated as  $\sim 35$  nm. Subsequently, the terrace thickness was evaluated as  $\sim 15$  nm.
